# Supplementary material for: Systems Level Analysis of the Yeast Osmo-Stat
Source: PubMed Central journal article supplement (PMC4981887; doi:10.1038/srep30950), 2016-08-12
Supplement: srep30950-s1.pdf [file srep30950-s1.pdf]

|    |                                                  |    |
|----|--------------------------------------------------|----|
| 1  | <b>Contents</b>                                  |    |
| 2  | Data Scaling .....                               | 3  |
| 3  | Hog1 phosphorylation data.....                   | 3  |
| 4  | SlT2 phosphorylation data .....                  | 3  |
| 5  | Volume data .....                                | 3  |
| 6  | Glycerol data .....                              | 3  |
| 7  | Methods .....                                    | 3  |
| 8  | Parameter Estimation .....                       | 3  |
| 9  | Model Selection .....                            | 2  |
| 10 | Identifiability Analysis .....                   | 2  |
| 11 | Mathematical Models.....                         | 2  |
| 12 | Modified Model Changes .....                     | 4  |
| 13 | Calcofluor mediated SlT2 activating module ..... | 4  |
| 14 | Supplementary Figures.....                       | 8  |
| 15 | Figure S1: .....                                 | 10 |
| 16 | Figure S2: .....                                 | 11 |
| 17 | Figure S3: .....                                 | 12 |
| 18 | Figure S4: .....                                 | 13 |
| 19 | Figure S5: .....                                 | 14 |
| 20 | Figure S6: .....                                 | 15 |
| 21 | Figure S7: .....                                 | 15 |
| 22 | Supplementary Tables .....                       | 16 |
| 23 | Table S1:.....                                   | 16 |
| 24 | Table S2:.....                                   | 17 |
| 25 | Table S3:.....                                   | 18 |
| 26 | Table S4:.....                                   | 19 |
| 27 | Table S5:.....                                   | 20 |
| 28 | Table S6:.....                                   | 22 |
| 29 | Table S7:.....                                   | 25 |
| 30 | Table S8:.....                                   | 28 |
| 31 | Supplementary References: .....                  | 31 |

1

2 **Data Scaling**3 ***Hog1 phosphorylation data***

4 We scaled the Hog1 phosphorylation data for model calibration. Hog1 phosphorylation  
5 levels were scaled to the maximum phosphorylated Hog1 after 0.8 M sorbitol shock,  
6 assuming that this value is the maximum Hog1 phosphorylation level.

7 ***Slp2 phosphorylation data***

8 We scaled the Slp2 phosphorylation data for model calibration. Slp2 phosphorylation  
9 levels were scaled to the maximum phosphorylated Slp2 upon 0.8 M hyper-osmotic  
10 shock followed by dilution to 0.27 M of sorbitol 30 minutes after. For the validation  
11 data we assumed that the average initial Slp2 phosphorylation level is 25% of the  
12 maximum explained in previous condition.

13 ***Volume data***

14 We scaled the volume measurements to the cell volume prior to 0.8 M sorbitol shock.

15 ***Glycerol data***

16 We scaled the glycerol measurements to the normalized measured glycerol 45 minutes  
17 after 0.8 M sorbitol shock (Eqn. 1).

$$18 \quad \text{Relative glycerol level} = \frac{\frac{[\text{Glycerol}]}{\text{Optical Density (OD)}^*V_{Rel}}}{\left[\frac{[\text{Glycerol}]}{\text{Optical Density (OD)}^*V_{Rel}}\right]_{45min}} \times 100 \quad (1)$$

19  $V_{Rel}$ =relative volume.

20 **Methods**21 ***Parameter Estimation***

22 Model parameters estimation was done using COPASI (version: 4.15) <sup>1</sup>. The  
23 Evolutionary Programming method was used to estimate model parameters. The  
24 weighted Sum of Squared Residuals (wSSR) was used as objective function (Eqn. 2).

$$25 \quad wSSR = \sum_{i=1}^m w_i \sum_{j=1}^n (\hat{y}_{i,j} - y_{i,j})^2 \quad (2)$$

26 with  $i=1, \dots, m$  as the number of experiments, and  $j=1, \dots, n$  as the data pointed for  
27 experiment  $i$ .  $w_i$  represents the respective weight of experiment  $i$ , set to the inverse of  
28 the average of the respective time series.  $\hat{y}_{i,j}$  is the simulated value for data point  
29 number  $j$  within experiment  $i$  and  $y_{i,j}$  is the measured data point  $j$  within experiment  $i$ .  
30 We used the 0.8-0.27 M sorbitol hyper-hypo-shock experiments with hypo-shock at 4',  
31 14' and 30' as well as the volume data for 0.8 M sorbitol hyper-shock to fit the model  
32 parameters.

## 1 **Model Selection**

2 In order to select the most parsimonious mathematical model, which best  
3 approximates the data, we used the Akaike Information Criterion corrected for small  
4 sample sizes ( $AIC_c$ ) (Eqn. 3).  $AIC_c$  is an information theoretic approach for model  
5 selection, based on Kullback-Leibler (K-L) concept of information loss when using a  
6 model to approximate full truth. The full truth includes an infinite number of  
7 parameters, which determine the systems output<sup>3</sup>.

$$8 \quad AIC_c = 2k + n \left( \ln \left( \frac{2\pi \cdot wSSR}{n} \right) + 1 \right) + \frac{2k(k+1)}{n-k-1} \quad (3)$$

9 where  $k$ ,  $n$  and  $wSSR$  represent number of parameters, number of data points and the  
10 weighted sum of squared residuals, respectively. Finally, models were ranked  
11 according to  $AIC_c$ , where the model with the minimum  $AIC_c$  score was ranked first. The  
12 K-L confidence set comprised of all models for which their likelihood relative to the  
13 estimated K-L best model likelihood, be  $\approx 1/8$ <sup>3</sup>.

14 In order to select and compare the best approximating model(s) we calculated the  
15 Akaike weights ( $AICw$ ) (Formula 4)<sup>3</sup>.

$$16 \quad AICw_i = \frac{e^{-\frac{1}{2}\Delta_i}}{\sum_{r=1}^R e^{-\frac{1}{2}\Delta_r}} \quad (4)$$

17 where  $\Delta_i = AIC_i - AIC_{min}$ , with  $AIC_i$  being the  $AIC_c$  for model  $i$ ,  $i=1, \dots, R$  according to  
18 ranking and  $AIC_{min}$  the minimal  $AIC_c$ . The  $AICw$ s can be considered as the weight of  
19 evidence in favour of a model given as a number between 0 and 1, i.e. the higher the  
20 weight, the closer the model is to the hypothetical true model<sup>3</sup>. We considered those  
21 models as the best approximating for which the relative value of Akaike weight is  $>$   
22  $1/8$ . The relative Akaike weight is the ratio of the models Akaike weight to the Best  
23 ranked model Akaike weight (Formula 5)<sup>2,3</sup>.

$$24 \quad \frac{AICw_i}{AICw_{max}} = \exp \left( -\frac{1}{2} \Delta_i \right) \quad (5)$$

## 25 **Identifiability Analysis**

26 We conducted profile likelihood based identifiability analysis<sup>4</sup> using COPASI as  
27 explained in the literature<sup>5</sup>. This method identifies structural as well as practical  
28 identifiability. Models with structural non-identifiability cannot be trained by the data.  
29 The non-identifiable model parameters cannot be trained by the data.

## 30 **Mathematical Models**

31 Three components were implemented differently leading to different candidate  
32 models. Each of these three components can adopt two possible setups. Thus, 8  
33 different combinations were generated. The alternative model formulations are

1 indicated by dashed components in Fig. 2. For a better overview we shortlist the  
2 components and their setups:

3 **A) Activate Hog1 inhibits Slt2 activation**

4 Two sets of models were designed based on inhibitory effect of the Hog1 on  
5 Slt2 activation upon hypo-osmotic shock.

- 6 I. Hog1 inhibits Slt2 activation.  
7 II. Hog1 does not inhibit Slt2 activation.

8 **B) Active Slt2 inhibits Hog1 activation**

9 Two sets of models were designed based on inhibitory effect of the Slt2 on  
10 Hog1 activity upon hypo-osmotic shock.

- 11 I. Slt2 inhibits Hog1 activity.  
12 II. Slt2 does not inhibit Hog1 activity.

13 **C) Sensitized negative feedback on CWISignal degradation**

14 Two sets of models were designed based on sensitized/not-sensitized  
15 regulation of *CWISignal* activation threshold:

- 16 I. There is a sensitized negative feedback from *CWISignal* to its  
17 degradation rate  
18 II. There is no sensitized negative feedback from *CWISignal* to its  
19 degradation rate

20 Mathematical formulation of models is explained in Tables S4-S8. The order of  
21 mathematical details in these tables is explained below:

22 **Table S4:**

23 This table lists ordinary differential equations of the master model.

24 **Table S5:**

25 This table lists the rate laws for the reactions from Table S4 and details the differences  
26 between the model alternatives.

27 **Table S6:**

28 This table lists the state variables and their initial conditions for the selected model. As  
29 models are initially set to steady state, some initial conditions are calculated from  
30 estimated/set ones. The latter are listed in Table S8.

31 **Table S7:**

32 This table lists auxiliary variables and physical quantities including volume, molar  
33 weight and cell surface calculation.

34 **Table S8:**

1 This table lists all estimated parameters including rate constants and initial conditions  
2 for the selected model.

### 3 **Modified Model Changes**

4 In order to reproduce the 4' Slt2 phosphorylation peak we increased the glycerol  
5 production approximately by a factor of 2.

$$6 \quad k_7 = 935.301 \rightarrow 1870 \left( \frac{\mu\text{mol}}{\text{fl} \cdot \text{Sec}} \right)$$

### 7 **Calcofluor mediated Slt2 activating module**

8 No model inside the models ensemble was designed such that can respond to the  
9 presence of the calcofluor in the medium. Therefore, we designed a new mathematical  
10 module that is able to activate the Slt2 upon calcofluor exposure. The new mathematical  
11 module is comprised of 5 species, namely *Calcofluor*, *CALSignal*, *Degrader*, *Slt2* and  
12 *Slt2P* (Figure S7a). The three new species *Calcofluor*, *CALSignal* and *Degrader*,  
13 represent the calcofluor white; the signal which activates Slt2; and a component which  
14 degrades the Slt2 activating signal, respectively. The corresponding module was then  
15 plugged in the model main model (Figure S7b). The new mathematical module  
16 parameters were estimated from Slt2 activation dynamics upon 0.11  $\mu\text{M}$  of calcofluor  
17 white, two hours after 0.8 M of sorbitol shock. No parameter from the selected model  
18 was dedicated for parameter estimation for reproducing the corresponding experimental  
19 result. The mathematical formulation of this mathematical module, its parameter values  
20 and the components initial concentrations are explained below:

21 **Rate laws:**

$$22 \quad v_a = k_a \cdot [\text{Calcofluor}],$$

$$23 \quad v_b = k_b \cdot [\text{CALSignal}] \cdot [\text{Slt2}],$$

$$24 \quad v_c = \frac{v_{\max\_c} \cdot [\text{Slt2P}]}{(K_{m\_c} + [\text{Slt2P}])},$$

$$25 \quad v_d = \frac{v_{\max\_d} \cdot [\text{CALSignal}] \cdot [\text{Degrader}]^h}{(S_{\text{half}}^h + [\text{Degrader}]^h)},$$

$$26 \quad v_e = \frac{v_{\max\_e} \cdot \text{Degrader}}{(K_{m\_e} + \text{Degrader})}.$$

27

28 **Initial concentrations:**

$$29 \quad [\text{Calcofluor}] = \begin{cases} 0 & \text{time} < 2 \text{ hours} \\ 1 * (1 - e^{-\left(\frac{\text{time}-2 \text{ hours}}{5}\right)}) & \text{else} \end{cases},$$

$$30 \quad [\text{CALSignal}]|_{t=0} = 0,$$

$$[\text{Degrader}]|_{t=0} = 0,$$

1  $[Slc2]|_{t=0}$  = see Table S6.

2  $[Slc2P]|_{t=0}$  = see Table S6.

3

4 Estimated parameters:

---

5  $k_a = 0.00133916 \text{ s}^{-1}$ ,

6  $k_b = 0.00860898 \text{ }\mu\text{M}^{-1} \cdot \text{s}^{-1}$ ,

7  $V_{\max\_c} = 5.29577 \text{ }\mu\text{M} \cdot \text{s}^{-1}$ ,

8  $K_{m_c} = 1384.04 \text{ }\mu\text{M}$ ,

9  $V_{\max\_d} = 27583.6 \text{ s}^{-1}$ ,

10  $S_{half} = 13.0308 \text{ }\mu\text{M}$ ,

11  $h = 16.4149$ ,

12  $V_{\max\_e} = 0.0142624 \text{ }\mu\text{M}^{-1} \cdot \text{s}^{-1}$ ,

13  $K_{m\_e} = 61.527 \text{ }\mu\text{M}^{-1} \cdot \text{s}^{-1}$ .

---

14

#### 15 **Simulation Instructions**

16 All models were implemented and calibrated using COPASI software, which allows for  
 17 exporting models in Systems Biology Markup Language (SBML). The selected model  
 18 is available as supplementary files both in COPASI and SBML (level2, version 4)  
 19 formats. The selected model can be found in the online Supplementary Materials both in  
 20 COPASI and SBML formats as well as in the BioModels database<sup>28</sup> (access identifier  
 21 MODEL1604100004). Different experimental conditions can be simulated using the  
 22 model and COPASI software. The 0.8 M sorbitol stress response is the simplest  
 23 experiment that can be simulated using the selected model. To this end, after opening  
 24 the “.cps” file by COPASI software, extracellular sorbitol concentration should be set to  
 25 0.8 M of sorbitol by setting model’s parameter s1 to 800000 ( $\mu\text{mol}$ ). The parameter s1  
 26 can be found under Model>Biochemical>Global Quantiles tabs in the COPASI file.

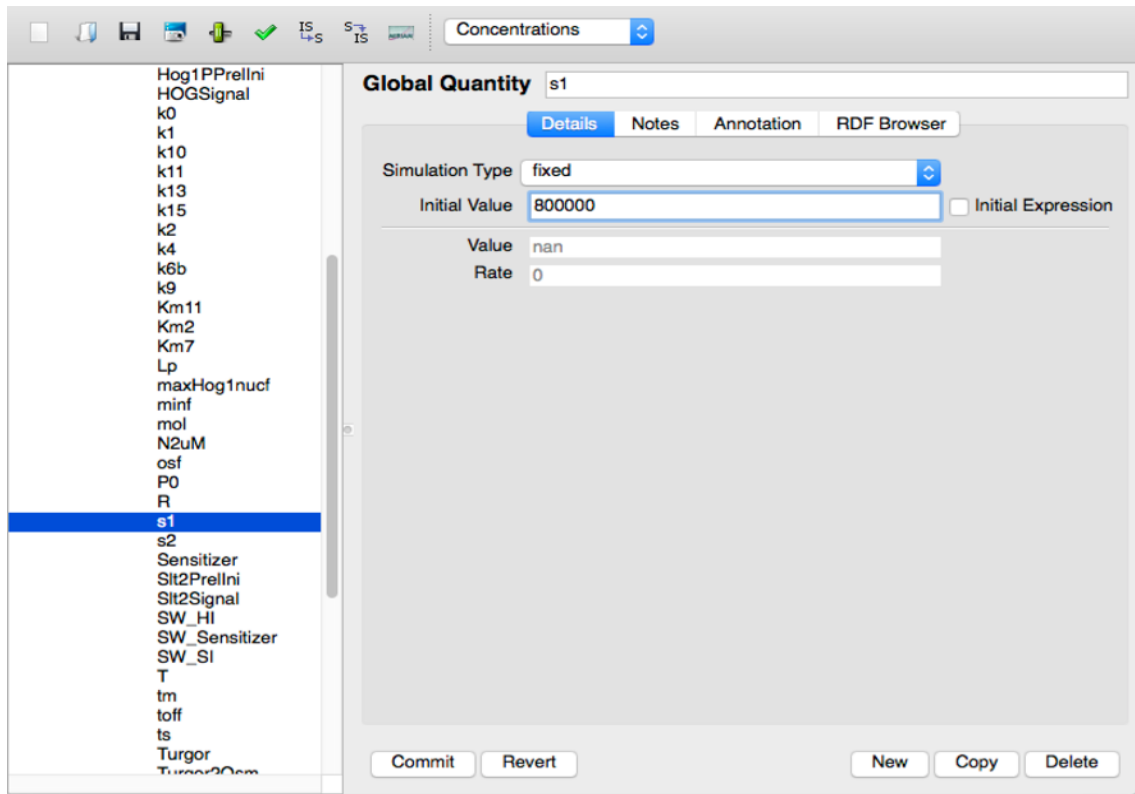

1

- 2 Moreover, further explanations regarding s1 parameter can be found in the  
 3 supplementary table S7 and in the COPASI file under Model>Biochemical>Global  
 4 Quantiles> cen parameter.

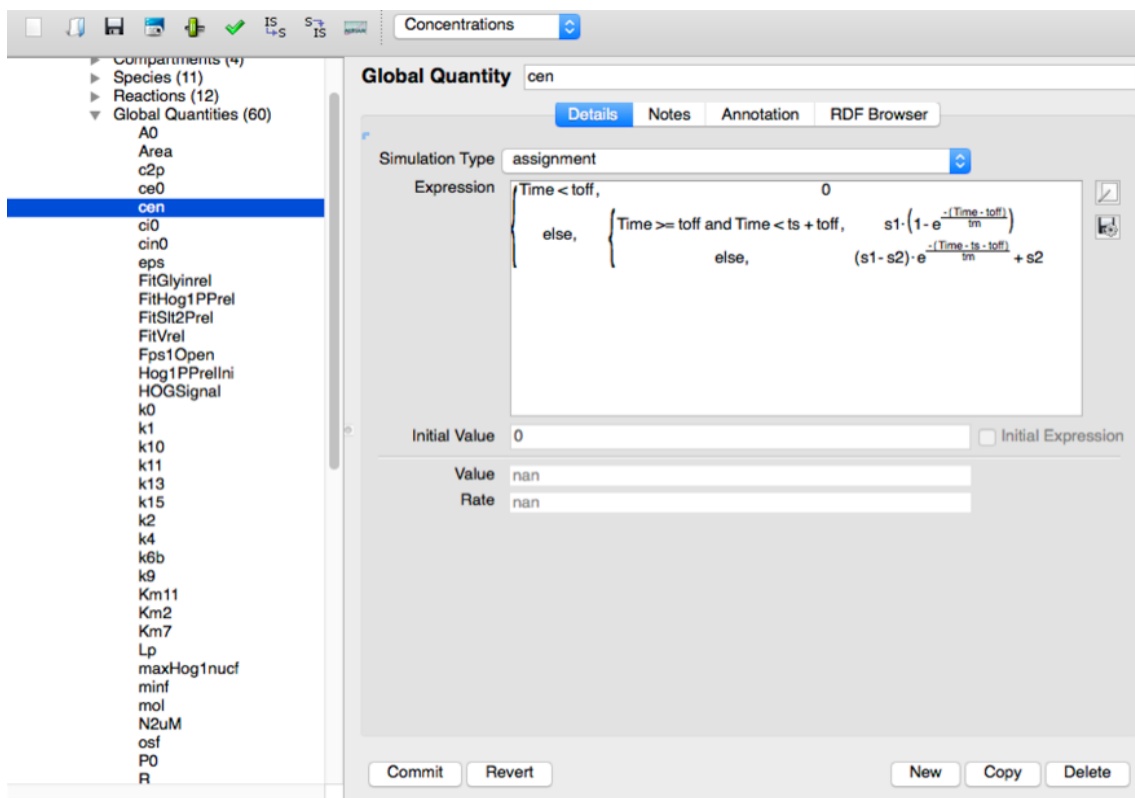

5



- 1 After setting this parameter, the 0.8 M sorbitol stress can be simulated using COPASI.
- 2 Simulations can be conducted using Time Course task in COPASI, Tasks> Time
- 3 Course. As a sample the simulation of the relative amounts of the Hog1PP and Slt2PP
- 4 are shown in the graph. The red and blue curves show Hog1PP and Slt2PP respectively.
- 5 It should be noted that the ordinate label in the simulation graph is automatically
- 6 adopted by COPASI, which should be corrected for different simulations when
- 7 reporting the plot.

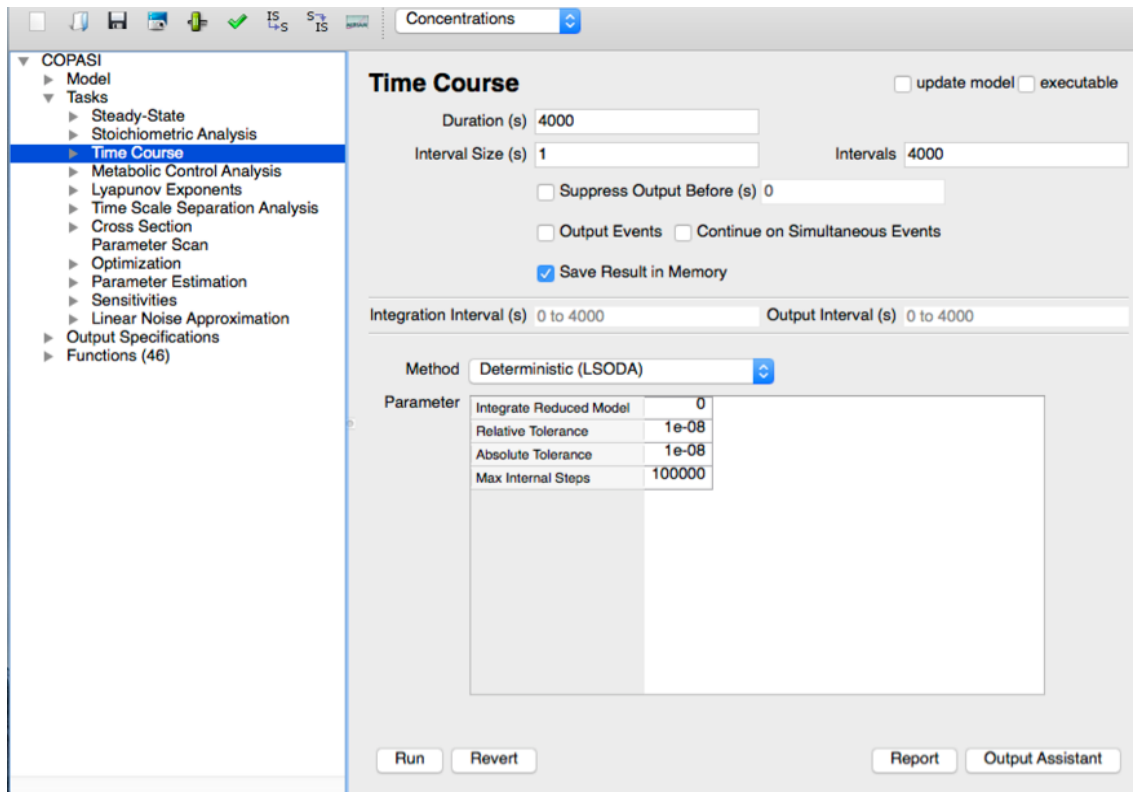

8

9

1

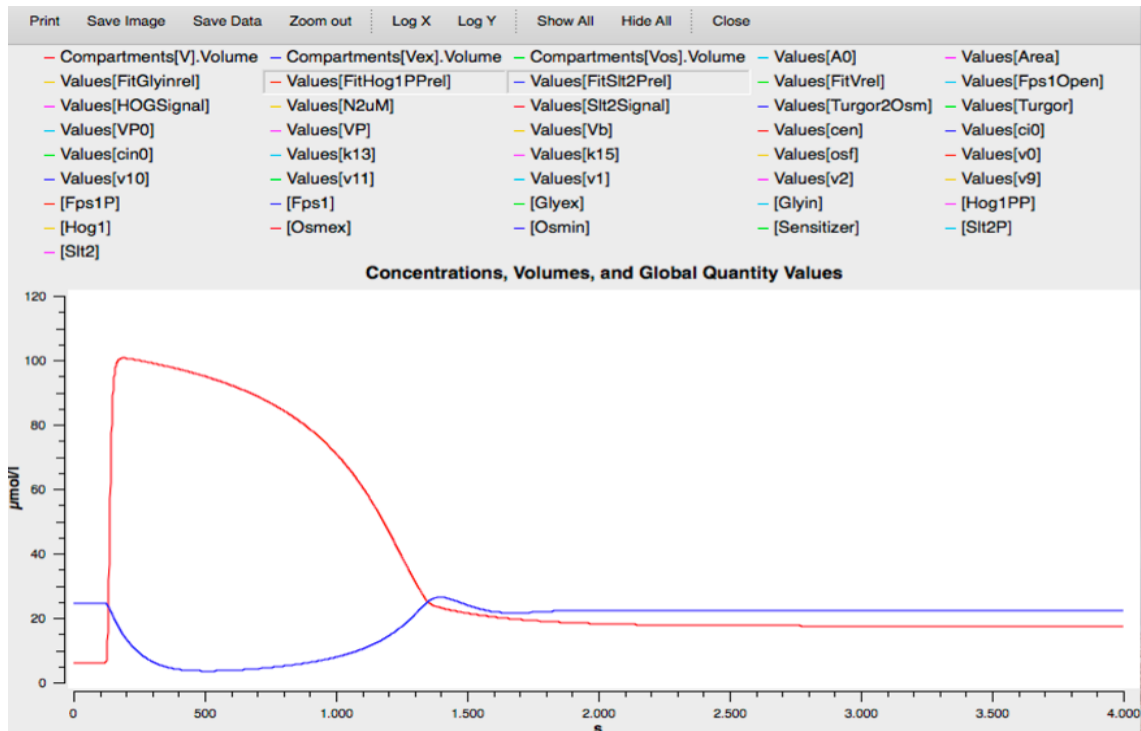

2

3 The hyper-hypo-osmotic stress experiment, 0.8 M sorbitol stress followed by dilution to  
 4 x M of sorbitol can easily be simulated by COPASI. Additional to the initial sorbitol  
 5 stress parameter,  $s1 = 800000$ , two other parameters should be adjusted. The first  
 6 parameter regulates the time between the hyperosmotic stress and the dilution,  $t_s$  (s).  
 7 The second one, namely,  $s2$ , regulates the final external sorbitol concentration that we  
 8 want to reach (supplementary table S7). For example, to impose a hyper-hypo-osmotic  
 9 stress with initial sorbitol concentration of 0.8 M and the dilution to 0.27 M of sorbitol  
 10 14 min following the initial hyperosmotic stress, one needs to set the above mentioned  
 11 parameters as below:

12  $s1 = 800000$  ( $\mu\text{mol}$ ),  $s2 = 270000$  ( $\mu\text{mol}$ ),  $t_s = 840$  (s).

13 Following this setting the model can be simulated using time course task as explained  
 14 earlier. The red and blue curves show Hog1PP and Slt2PP respectively.

15

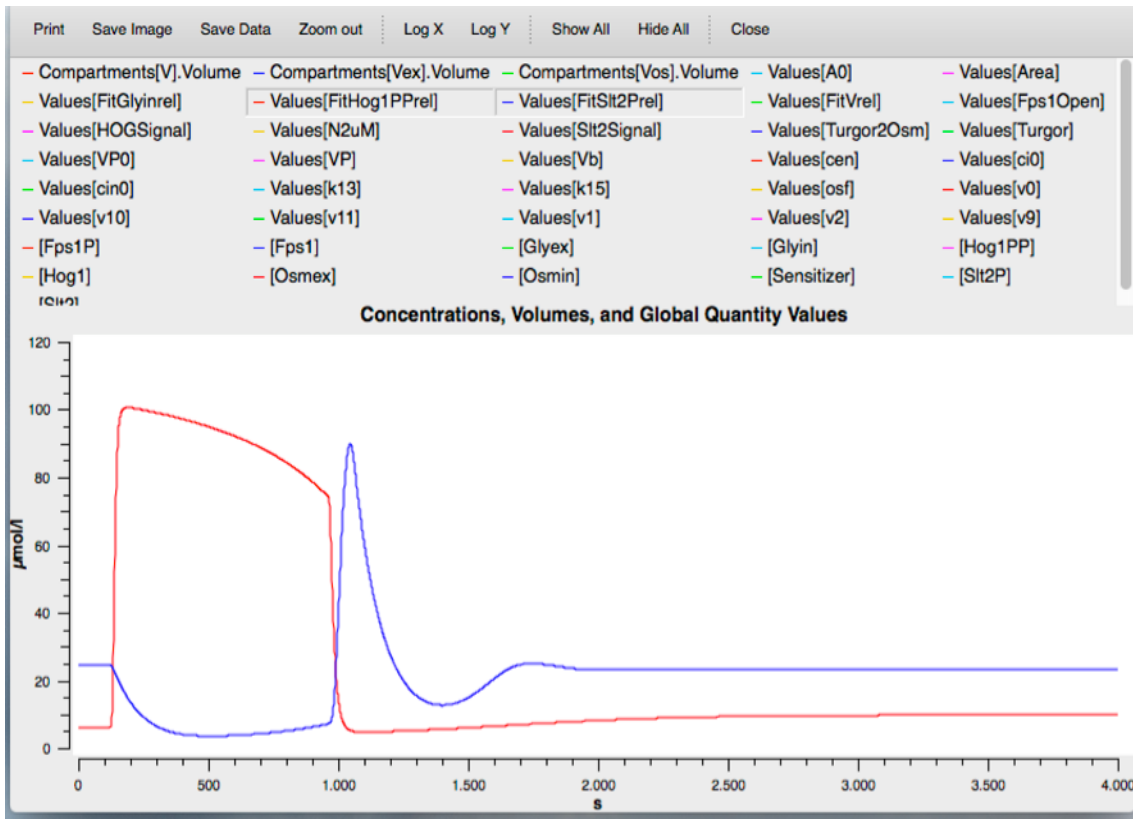

- 1
- 2
- 3
- 4
- 5
- 6
- 7
- 8
- 9
- 10
- 11
- 12
- 13
- 14

## 1 Supplementary Figures

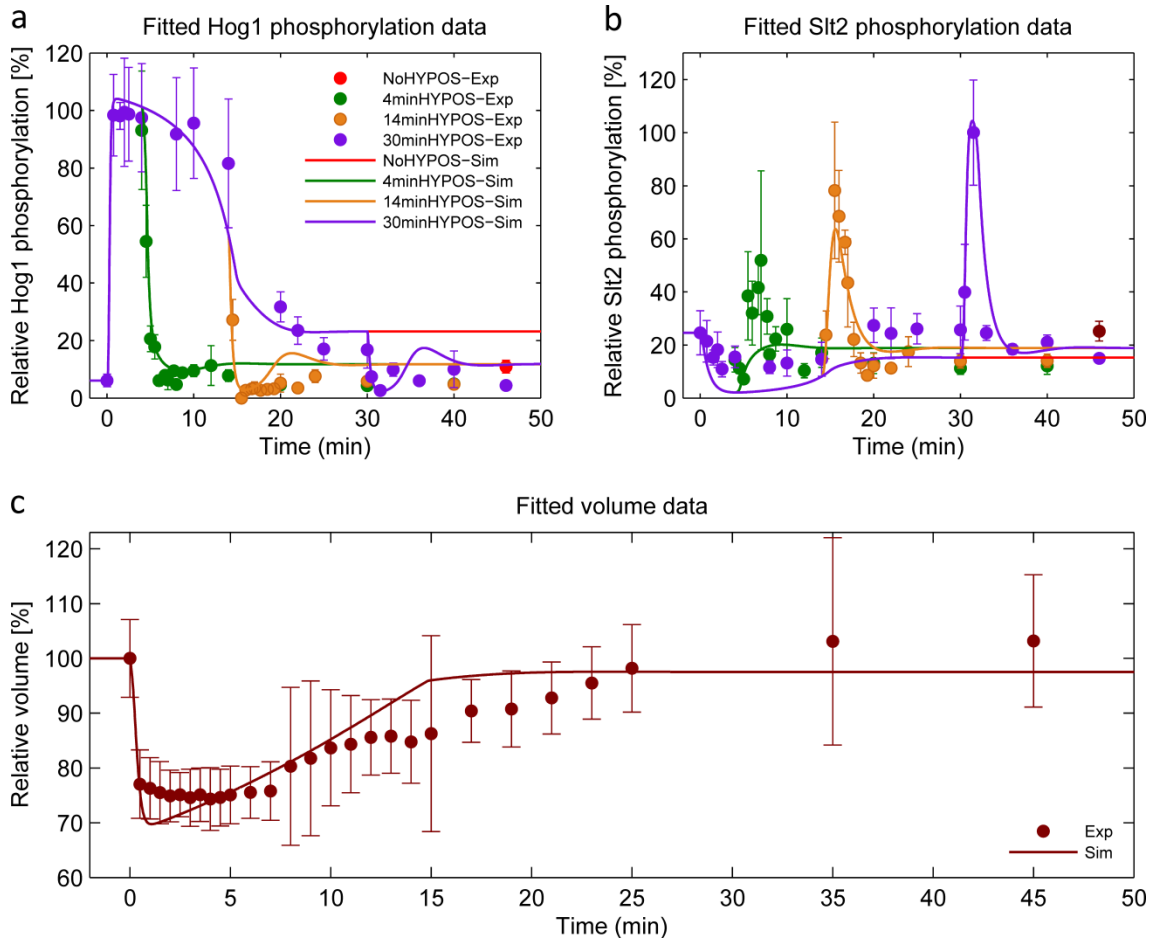

2  
3 **Figure S1: Reproduction of experimental data dedicated for parameter estimation**  
4 **using model with fixed Slt2 activation threshold.** Relative Hog1 and Slt2  
5 phosphorylation data and relative single cell volume measurements, used for models  
6 parameters estimation, are plotted versus time. Simulations were done using the best  
7 ranked model from the ensemble of models with fixed Slt2 activation threshold. Solid  
8 lines show model simulations and filled circles (•) show the experimental data (Mean ±  
9 SD (n=3)). **a)** Comparison between Hog1 phosphorylation data and respective  
10 simulation for 0.8 M sorbitol shock only (NoHYPOS-Ex) and 4', 14' and 30' hypo-shock  
11 experiments using the best ranked model (4minHYPOS, 14minHYPOS, 30minHYPOS,  
12 respectively). **b)** Comparison between Slt2 phosphorylation data and its simulation for  
13 0.8 M sorbitol shock only, 4', 14', 30' hypo-shock using best ranked model. The  
14 selected model can reproduce the 4' Slt2 activation. **c)** Comparison between relative  
15 value of single cell volume measurements and its simulation. The same color code was  
16 used for panels A&B.

17

18

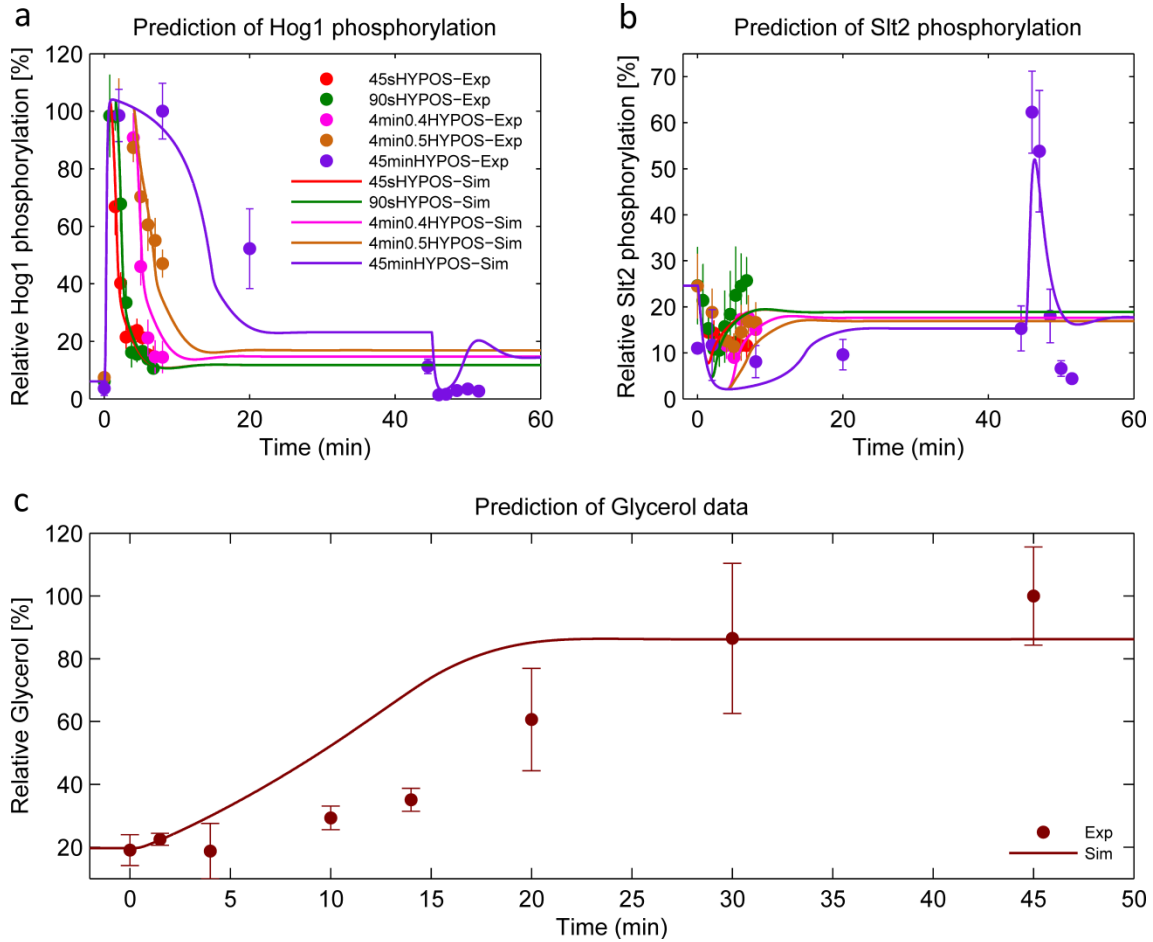

1  
 2 **Figure S2: Reproduction of experimental data used for prediction using model with**  
 3 **fixed Slt2 activation threshold.** Relative Hog1 and Slt2 phosphorylation data and  
 4 relative value of cellular glycerol measurements, used for prediction, are plotted  
 5 versus time. Simulations were done using the best ranked model from the ensemble of  
 6 models with fixed Slt2 activation threshold. Solid lines show model simulations and  
 7 filled circles (•) show the experimental data (Mean  $\pm$  SD (n=3)). **a)** Comparison  
 8 between Hog1 phosphorylation data and its simulation for 0.8 M sorbitol shock with  
 9 subsequent dilution to 0.27 M sorbitol at 45", 90" and 45' (45SecHYPO-Ex, 90SecHYPO-  
 10 Ex, 45minHYPO-Ex) and 0.8 M sorbitol shock with subsequent dilution to 0.5 and 0.4 M  
 11 sorbitol at 4' (4min0.5HYPO-Ex, 4min0.4HYPO-Ex) using the best ranked model. **b)**  
 12 Comparison between Slt2 phosphorylation data and its simulation for 0.8 M sorbitol  
 13 shock with subsequent dilution to 0.27 M sorbitol at 45", 90" and 45' and 0.8 M  
 14 sorbitol shock with subsequent dilution to 0.5 and 0.4 M sorbitol at 4' using best  
 15 ranked model. **c)** Comparison between relative value of intracellular glycerol content  
 16 for 0.8 M sorbitol shock and its simulation. We used same color code for panels A&B.

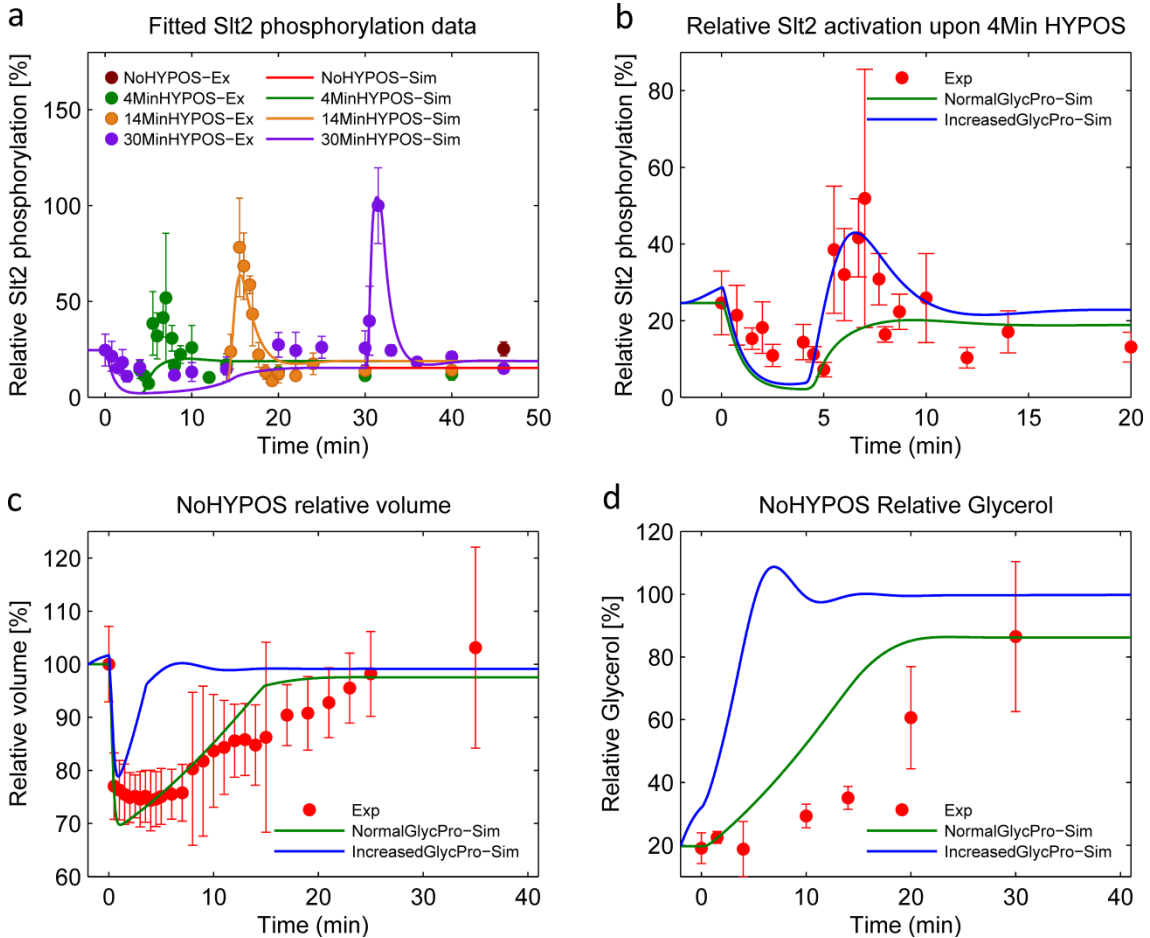

1  
 2 **Figure S3: Models were not able to reproduce 4 minute Slt2 phosphorylation peak.**  
 3 Solid lines show model simulations and (•) marks show the experimental data (Mean ±  
 4 SD (n=3)). **a**) Relative Slt2 phosphorylation data and simulations for 0.8 M sorbitol  
 5 hyper-osmotic shock with subsequent decrease in external osmolarity to 0.27 M at 4',  
 6 14', 30' using best ranked model. The selected model cannot reproduce 4' Slt2  
 7 activation peak. **b-d**) Simulation of the selected model with normal (green line) and  
 8 high (blue line) glycerol production is compared to experimental data. **b**) The model  
 9 with higher glycerol production rate can reproduce 4' Slt2 activation, whereas model  
 10 with normal glycerol production rate cannot. **c**) The model with normal glycerol  
 11 production rate simulates the relative volume within the measurements error bar,  
 12 whereas the model with high glycerol production rate fails. **d**) The model with normal  
 13 glycerol production rate predicts the relative glycerol within the measurements error  
 14 bar, whereas the model with high glycerol production rate fails.

15

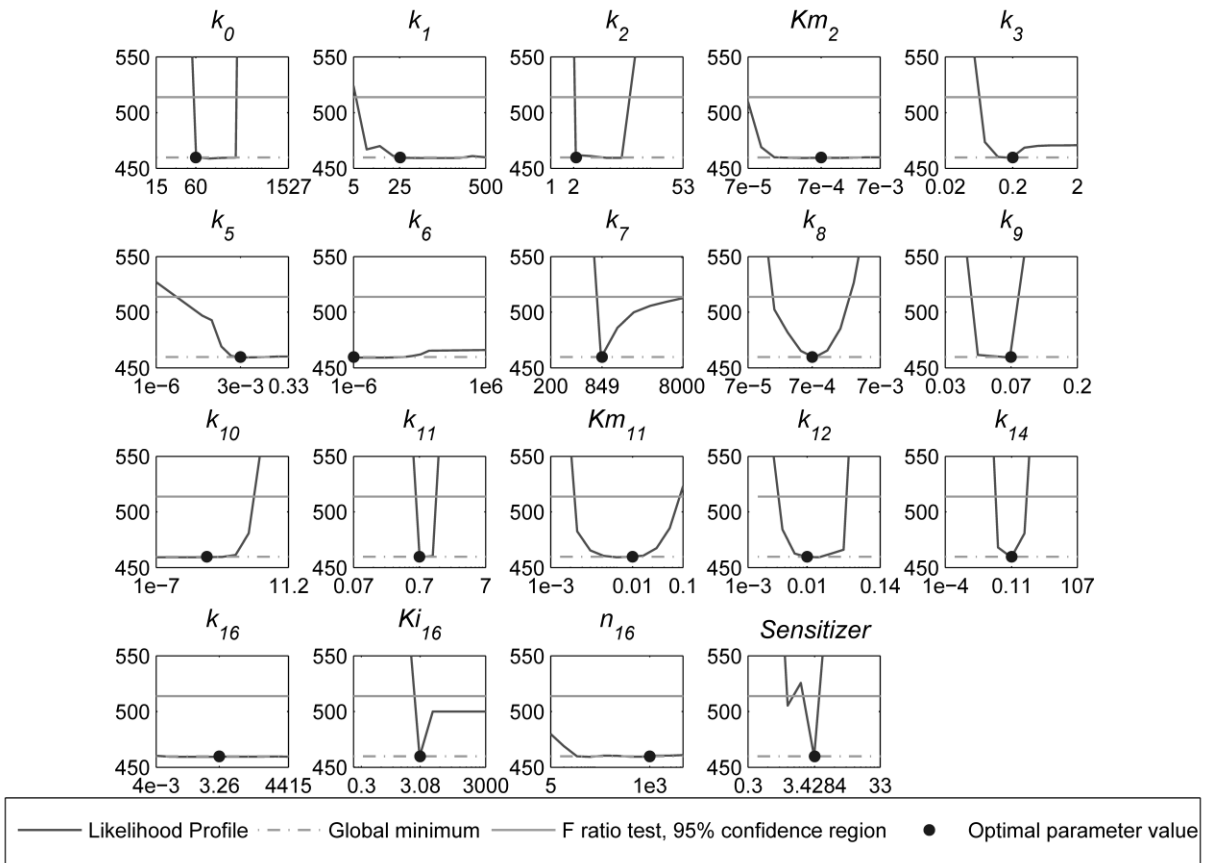

1  
2  
3  
4  
5  
6  
7

**Figure S4: Likelihood profile-based parameter identifiability analysis for the selected model.** The SSR after parameter estimation is plotted versus the scanned parameter values (black solid line). 95% confidence region is calculated by F-ratio test (grey solid line). The minimum objective value reached is shown at bottom (grey dashed line) and the corresponding estimated parameter value is shown by a bold dot (•).

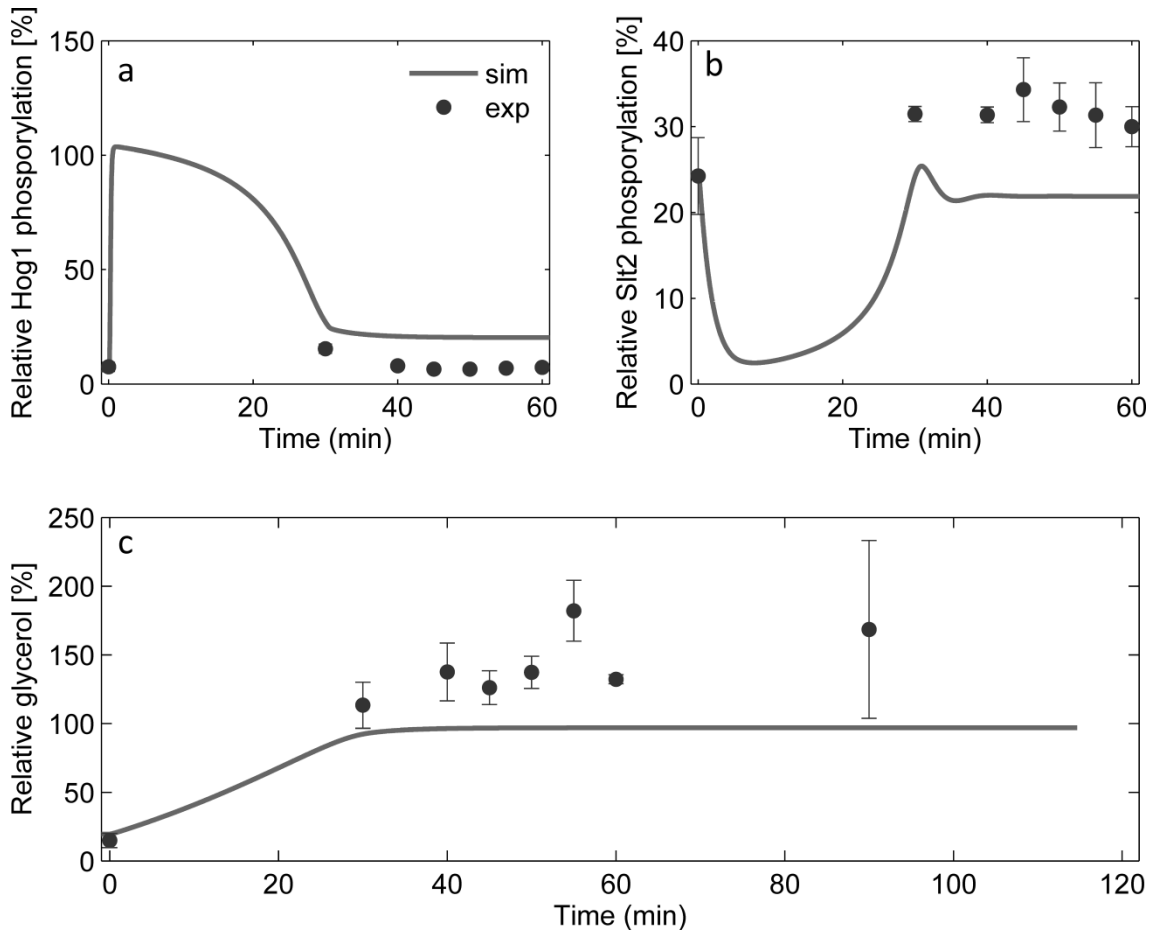

1  
2 **Figure S5: Hog1 and Slt2 Phosphorylation dynamics upon 1.0 M Sorbitol shock.**

3 Relative Slt2 and Hog1 phosphorylation data upon 1.0 M of sorbitol shock are plotted  
4 versus time. Solid lines show model simulations and filled circles (•) show the  
5 experimental data (Mean  $\pm$  SD (n=3)). **a & b**) Comparison of Slt2 and Hog1  
6 phosphorylation data with their simulation upon 0.8 M of sorbitol shock. Although the  
7 overall Slt2 phosphorylation level has increased after sorbitol shock, no marked Slt2  
8 activation is observed in 60 minutes comparing to earlier time-points namely 30 and  
9 40 minutes. This is opposed to the observation made by Garcia et al<sup>6</sup> in which a strong  
10 Slt2 activation is observed upon 1.0 M of sorbitol shock. **c**) Intracellular glycerol level  
11 after 1.0 M of sorbitol shock is plotted versus time. Again no marked glycerol  
12 concentration drop is observed.

13



1

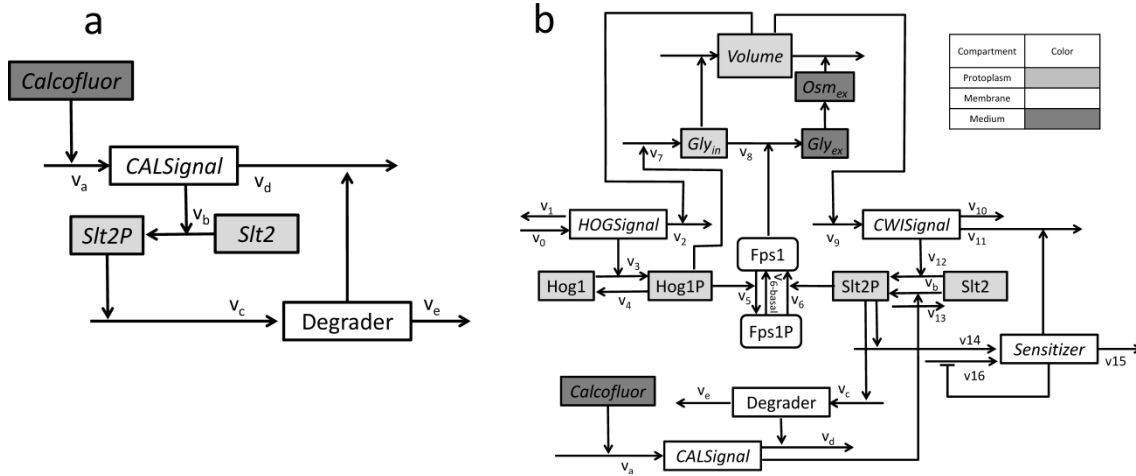

2

3

**Figure S6: Slt2 activating module.**

4

5

6

7

8

9

10

11

To activate the Slt2 upon calcofluor exposure we designed a small mathematical module which converts the presence of the calcofluor in the medium to a signal which activates the Slt2. a) This mathematical module contains 3 new species, *Calcofluor*, *CALSignal* and *Degradier*. The *CALSignal* is activated in response to calcofluor,  $v_1$ , and induces the Slt2 phosphorylation,  $v_2$ . Phosphorylated Slt2 activates the species *Degradier*,  $v_4$ , which induces the *CALSignal* decay,  $v_4$ . The *Degradier* is constantly degraded via reaction  $v_5$ . b) The schematic shows the way that the Slt2 activating module is plugged in to the selected model.

12

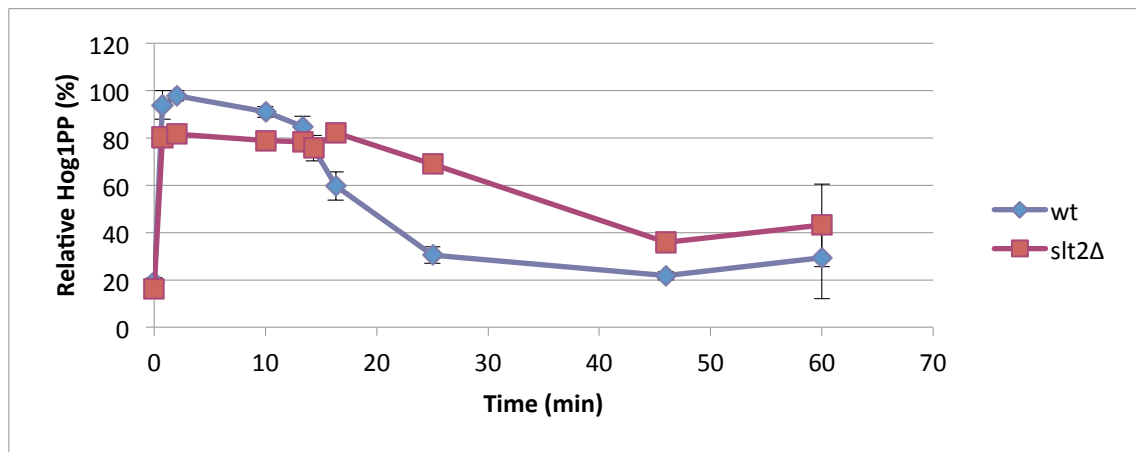

13

**Figure S7: Hog1 response in *slt2Δ* mutants.**

14

15

16

Hog1 activation upon 0.8 M of sorbitol stress was monitored in *slt2Δ* mutant cells. Hog1 deactivates slower in *slt2Δ* mutant cells.

1 **Supplementary Tables**

2 **Table S1:** Models are ranked according to Akaike Information Criterion corrected for  
 3 small sample size (*AICc*). The data from 45", 90", 45' HYPOS (0.8M to 0.27M sorbitol)  
 4 and 4' HYPOS (0.8M to 0.4M and 0.5M sorbitol respectively) experiments were not  
 5 used for parameter estimation (*wSSR*). The best ranked model shows no cross talk  
 6 between Hog1 and Slt2. Abbreviations: *n*: number of data points, *k*: number of  
 7 parameters, *wSSR*: weighted sum of squared residuals, *AICc*: Akaike Information  
 8 Criterion corrected for small sample size, *AICw*: Akaike weights.

| Rank            | Model name | HIS                                                                               | SIH                                                                               | 4MiP                                                                              | n   | k  | SSR    | <i>AICc</i> | <i>AICc</i> weight | Cutoff |
|-----------------|------------|-----------------------------------------------------------------------------------|-----------------------------------------------------------------------------------|-----------------------------------------------------------------------------------|-----|----|--------|-------------|--------------------|--------|
| 1 <sup>st</sup> | Model Nr.3 |  |  |  | 136 | 14 | 500.30 | 594.57      | 0.963              | OK     |
| 2 <sup>nd</sup> | Model Nr.4 |  |  |  | 136 | 17 | 499.98 | 602.20      | 0.021              | NO     |
| 3 <sup>rd</sup> | Model Nr.1 |  |  |  | 136 | 17 | 502.78 | 602.96      | 0.015              | NO     |
| 4 <sup>th</sup> | Model Nr.2 |  |  |  | 136 | 19 | 503.00 | 608.38      | 0.001              | NO     |

9

| Variable Name                           |                                        |                                       | Marker                                                                              |
|-----------------------------------------|----------------------------------------|---------------------------------------|-------------------------------------------------------------------------------------|
| HIS                                     | SIH                                    | 4MiP                                  |                                                                                     |
| Hog1PP Inhibits Slt2 activation         | Slt2P Inhibits Hog1 activation         | Model reproduces 4' Slt2 peak         |  |
| Hog1PP does not Inhibit Slt2 activation | Slt2P does not inhibit Hog1 activation | Model does not reproduce 4' Slt2 peak |  |

10  
 11  
 12  
 13  
 14  
 15  
 16  
 17  
 18  
 19  
 20  
 21  
 22

1 **Table S2:** Models are ranked according to Akaike Information Criterion corrected for  
 2 small sample size ( $AICc$ ). The data from NoHYPOS, 45", 90", 45' HYPOS (0.8M to 0.27M  
 3 sorbitol) and 4' HYPOS (0.8M to 0.4M and 0.5M sorbitol respectively) experiments  
 4 were also used for parameter estimation (wSSR). The best ranked model shows no  
 5 cross talk between Hog1 and Slt2 again. Abbreviations:  $n$ : number of data points,  $k$ :  
 6 number of parameters,  $wSSR$ : weighted sum of squared residuals,  $AICc$ : Akaike  
 7 Information Criterion corrected for small sample size,  $AICw$ : Akaike weights.

| Rank            | Model name | HIS                                                                               | SIH                                                                               | 4MiP                                                                              | n   | k  | SSR    | $AICc$ | $AICc$ weight | Cutoff |
|-----------------|------------|-----------------------------------------------------------------------------------|-----------------------------------------------------------------------------------|-----------------------------------------------------------------------------------|-----|----|--------|--------|---------------|--------|
| 1 <sup>st</sup> | Model Nr.3 |  |  |  | 234 | 14 | 736.98 | 962.44 | 0.953         | OK     |
| 2 <sup>nd</sup> | Model Nr.4 |  |  |  | 234 | 17 | 738.33 | 969.78 | 0.024         | NO     |
| 3 <sup>rd</sup> | Model Nr.1 |  |  |  | 234 | 17 | 739.14 | 970.04 | 0.022         | NO     |
| 4 <sup>th</sup> | Model Nr.2 |  |  |  | 234 | 19 | 744.01 | 976.29 | 0.001         | NO     |

8

| Variable Name                           |                                        |                                       | Marker                                                                              |
|-----------------------------------------|----------------------------------------|---------------------------------------|-------------------------------------------------------------------------------------|
| HIS                                     | SIH                                    | 4MiP                                  |                                                                                     |
| Hog1PP Inhibits Slt2 activation         | Slt2P Inhibits Hog1 activation         | Model reproduces 4' Slt2 peak         |   |
| Hog1PP does not Inhibit Slt2 activation | Slt2P does not inhibit Hog1 activation | Model does not reproduce 4' Slt2 peak |  |

9

10

1 **Table S3:** Models are ranked according to Akaike Information Criterion corrected for  
 2 small sample size (*AICc*). The data from NoHYPOS, 45", 90", 4' (0.8M sorbitol to 0.4M  
 3 and 0.5M hypo-osmotic shock respectively) and 45' hyper-osmotic shock experiments  
 4 were used for parameter estimation (*wSSR*). All models with sensitizer component  
 5 were ranked in top 4 and were able to fit 4' Slt2 activation peak (4MiP). The best  
 6 ranked model shows no cross talk between Hog1 and Slt2 (HIS and SIH). Abbreviations:  
 7 *n*: number of data points, *k*: number of parameters, *wSSR*: weighted sum of squared  
 8 residuals, *AICc*: Akaike Information Criterion corrected for small sample size, *AICw*:  
 9 Akaike weights.

| Rank            | Model name | HIS                                                                                 | SIH                                                                                 | 4MiP                                                                                | <i>n</i> | <i>k</i> | <i>wSSR</i> | <i>AICc</i> | <i>AICc</i> weight | Cutoff |
|-----------------|------------|-------------------------------------------------------------------------------------|-------------------------------------------------------------------------------------|-------------------------------------------------------------------------------------|----------|----------|-------------|-------------|--------------------|--------|
| 1 <sup>st</sup> | Model Nr.7 |    |    |    | 234      | 19       | 391.43      | 826.00      | 0.594              | OK     |
| 2 <sup>nd</sup> | Model Nr.8 |    |    |    | 234      | 21       | 385.49      | 827.23      | 0.321              | OK     |
| 3 <sup>rd</sup> | Model Nr.5 |    |    |    | 234      | 21       | 391.31      | 830.74      | 0.056              | NO     |
| 4 <sup>th</sup> | Model Nr.6 |    |    |    | 234      | 23       | 385.29      | 832.01      | 0.029              | NO     |
| 5 <sup>th</sup> | Model Nr.3 |    |    |    | 234      | 14       | 736.98      | 962.44      | 0                  | NO     |
| 6 <sup>th</sup> | Model Nr.4 |    |    |    | 234      | 17       | 738.33      | 969.78      | 0                  | NO     |
| 7 <sup>th</sup> | Model Nr.1 |   |   |   | 234      | 17       | 739.14      | 970.04      | 0                  | NO     |
| 8 <sup>th</sup> | Model Nr.2 |  |  |  | 234      | 19       | 744.01      | 976.29      | 0                  | NO     |

10

| Variable Name                           |                                        |                                       | Marker                                                                              |
|-----------------------------------------|----------------------------------------|---------------------------------------|-------------------------------------------------------------------------------------|
| HIS                                     | SIH                                    | 4MiP                                  |                                                                                     |
| Hog1PP Inhibits Slt2 activation         | Slt2P Inhibits Hog1 activation         | Model reproduces 4' Slt2 peak         |  |
| Hog1PP does not inhibit Slt2 activation | Slt2P does not inhibit Hog1 activation | Model does not reproduce 4' Slt2 peak |  |

11

12

1 **Table S4: Ordinary differential equation system of the master model.**

- 2 The equation with the dagger sign (†) is only present in the models with sensitized  
 3 negative feedback.

---

 ODEs

$$\frac{dV_{os}}{dt} = -Lp \cdot Area \cdot \left( Turgor + f_{c2p} \cdot R \cdot T \cdot (Osmo_{ex} - Osmo_{in}) \right)$$

$$\frac{d([Hog1Signal] \cdot V_{membrane})}{dt} = V_{membrane} \cdot (v_0 - v_1 - v_2)$$

$$\frac{d([Hog1] \cdot V_{os})}{dt} = +V_{os} \cdot (-\{v_{3-a}, v_{3-b}\} + v_4)$$

$$\frac{d([Hog1PP] \cdot V_{os})}{dt} = +V_{os} \cdot (\{v_{3-a}, v_{3-b}\} - v_4)$$

$$\frac{d([Fps1])}{dt} = V_{membrane} \cdot (-v_5 + v_6 + v_{6b})$$

$$\frac{d([Fps1P])}{dt} = V_{membrane} \cdot (v_5 - v_6 - v_{6b})$$

$$\frac{d([Gly_{in}] \cdot V_{os})}{dt} = +V_{os} \cdot v_7 - v_8$$

$$\frac{d([Gly_{ex}] \cdot V_{medium})}{dt} = v_8$$

$$\frac{d([Slr2Signal] \cdot V_{membrane})}{dt} = V_{membrane} \cdot (v_9 - v_{10} - \{v_{11-a}, v_{11-b}\})$$

$$\frac{d([Slr2] \cdot V_{os})}{dt} = +V_{os} \cdot (-\{v_{12-a}, v_{12-b}\} + v_{13})$$

$$\frac{d([Slr2PP] \cdot V_{os})}{dt} = +V_{os} \cdot (\{v_{12-a}, v_{12-b}\} - v_{13})$$

$$\dagger \frac{d([Sensitizer] \cdot V_{membrane})}{dt} = V_{membrane} \cdot (v_{14} + v_{16} - v_{15})$$


---

4

5

1 **Table S5: Rate equations of the master model including different model alternatives.**

2 Concentrations are denoted by  $[\ ]$  and initial concentration by  $[\ ]_0$ . The auxiliary  
 3 variables and parameters are described in Table S7. Bold parameters are free  
 4 parameters that are estimated from data and their value is reported in Table S8.  
 5 Reactions with dagger ( $\dagger$ ) sign are only present in the models with sensitized negative  
 6 feedback.

| Rate       | Rate law                                                                          | Description                                                        |
|------------|-----------------------------------------------------------------------------------|--------------------------------------------------------------------|
| $V_0$      | $k_0$                                                                             | <i>Hog1Signal</i> production                                       |
| $V_1$      | $k_1 \cdot [Hog1Sensor]$                                                          | <i>Hog1Signal</i> degradation                                      |
| $V_2$      | $\frac{v_{max2} \cdot V_{os} \cdot [Hog1Sensor]}{k_{m2} + [Hog1Sensor]}$          | Osmolytically active volume mediated <i>Hog1Signal</i> degradation |
| $V_{3-a}$  | $v_{max3} \cdot [Hog1Sensor] \cdot [Hog1]$                                        | <i>Hog1</i> phosphorylation                                        |
| $V_{3-b}$  | $\frac{v_{max3} \cdot [Hog1Sensor] \cdot [Hog1]}{1 + k_{i3} \cdot [Slt2PP]^{n3}}$ | <i>Slt2PP</i> mediated <i>Hog1</i> activation inhibition           |
| $V_4$      | $k_4 \cdot [Hog1PP]$                                                              | <i>Hog1PP</i> dephosphorylation                                    |
| $V_5$      | $k_5 \cdot [Hog1PP] \cdot [Fps1]$                                                 | <i>Hog1PP</i> mediated <i>Fps1</i> closure                         |
| $V_6$      | $k_6 \cdot [Slt2PP] \cdot [Fps1P]$                                                | <i>Slt2PP</i> mediated <i>Fps1P</i> dephosphorylation              |
| $V_{6b}$   | $k_{6b} \cdot [Fps1P]$                                                            | <i>Fps1P</i> dephosphorylation                                     |
| $V_7$      | $\frac{v_{max7} \cdot [Hog1PP]}{k_{m7} + [Hog1PP]}$                               | <i>Hog1PP</i> mediated Glycerol production                         |
| $V_8$      | $Fps1Open \cdot k_8 \cdot A \cdot ([Gly_{in}] - [Gly_{ex}])$                      | <i>Fps1</i> facilitated glycerol diffusion                         |
| $V_9$      | $k_9 \cdot V_{os}$                                                                | Osmolytically active volume mediated <i>Slt2Signal</i> production  |
| $V_{10}$   | $k_{10} \cdot [Slt2Signal]$                                                       | <i>Slt2Signal</i> degradation                                      |
| $V_{11-a}$ | $\frac{v_{max11} \cdot [Slt2Signal]}{k_{m11} + [Slt2Signal]}$                     | <i>Slt2Signal</i> degradation<br>(In models without                |

|                    |                                                                                      |                                                       |
|--------------------|--------------------------------------------------------------------------------------|-------------------------------------------------------|
|                    |                                                                                      | sensitized feedback)                                  |
| $\dagger V_{11-b}$ | $\frac{v_{max11} \cdot [Sensitizer] \cdot [Slt2Signal]}{k_{m11} + [Slt2Signal]}$     | Sensitizer mediated<br>Slt2Signal degradation         |
| $V_{12-a}$         | $k_{12} \cdot [Slt2Signal] \cdot [Slt2]$                                             | Slt2 Phosphorylation                                  |
| $V_{12-b}$         | $\frac{v_{max12} \cdot [Slt2Signal] \cdot [Slt2]}{1 + k_{i12} \cdot [Hog1PP]^{n12}}$ | Hog1PP mediated Slt2<br>activation inhibition         |
| $V_{13}$           | $k_{13} \cdot [Slt2PP]$                                                              | Slt2PP<br>dephosphorylation                           |
| $\dagger V_{14}$   | $k_{14} \cdot [Slt2PP]$                                                              | Slt2PP mediated<br>Sensitizer production              |
| $\dagger V_{15}$   | $k_{15} \cdot [Sensitizer]$                                                          | Sensitizer degradation                                |
| $\dagger V_{16}$   | $\frac{k_{16}}{1 + \left(\frac{Sensitizer}{k_{i16}}\right)^{n16}}$                   | Auto inhibitory<br>regulated Sensitizer<br>production |

1

2

1 **Table S6: State variables and their initial conditions.**

2 Model's state variables and their initial concentrations are listed below.  $[\ ]_0$  indicates  
 3 initial concentrations. Volumes are in femtolitre (fL), concentrations are in ( $\mu\text{mol}/\text{fL}$ ).  
 4 Bold parameters are free parameters that are estimated from data and their value is  
 5 reported in Table S6. State variables with dagger ( $\dagger$ ) sign are only present in the  
 6 models with sensitized negative feedback.

| State variable<br>(Compartment) | Initial Concentration                                               | Remark                                                                                                                                                        |
|---------------------------------|---------------------------------------------------------------------|---------------------------------------------------------------------------------------------------------------------------------------------------------------|
| $V_{os}$                        | $V_0 \cdot osf_0$                                                   | Osmolytically active volume, derived from a total cell volume of 50 fL and a solid base volume of 41% <sup>7</sup> .                                          |
| $Fps1$                          | $\frac{907 \cdot f_{N2\mu M}}{2}$                                   | Aquaglyceroporin <i>Fps1</i> is located in cell membrane. This is the open form of <i>Fps1</i> protein. The total amount of <i>Fps1</i> is supposed constant. |
| $Fps1P$                         | $\frac{907 \cdot f_{N2\mu M}}{2}$                                   | Activated <i>Hog1</i> phosphorylates <i>Rgc2</i> protein which leads in <i>Fps1</i> closure <sup>8</sup> .                                                    |
| $Hog1$                          | $6788 \cdot f_{N2\mu M} \cdot (1 - [Hog1PP]_0) \cdot maxHog1nucf_0$ | <i>Hog1</i> is the Map kinase of High Osmolarity Glycerol pathway.                                                                                            |
| $Hog1PP$                        | $6788 \cdot f_{N2\mu M} \cdot [Hog1PP]_0 \cdot maxHog1nucf_0$       | Double phosphorylated, i.e. active, <i>Hog1</i> MAP kinase. It was derived from data that 6.1 % of the maximal phosphorylation is the steady state            |



|                |                                                                     |                                                                                                                                                                                                                                                        |
|----------------|---------------------------------------------------------------------|--------------------------------------------------------------------------------------------------------------------------------------------------------------------------------------------------------------------------------------------------------|
|                |                                                                     | activation. $f_n$ is the fraction in the nucleus at maximal phosphorylation.                                                                                                                                                                           |
| $Slt2$         | $3230 \cdot f_{N2\mu M} \cdot (1 - [Slt2PP]_0) \cdot maxHog1nucf_0$ | $Slt2$ is the MAP Kinase of cell Wall Integrity pathway.                                                                                                                                                                                               |
| $Slt2PP$       | $3230 \cdot f_{N2\mu M} \cdot [Slt2PP]_0 \cdot maxHog1nucf_0$       | Double phosphorylated, i.e. active, $Slt2$ MAP kinase. It was derived from data that 24.6 % of the maximal phosphorylation is the steady state activation. $f_n$ is the fraction in the nucleus at maximal phosphorylation.                            |
| $[Gly_{in}]_0$ | 180000                                                              | Intracellular glycerol, approximated by assuming a measured value of 0.1 mM/OD in 1 ml sample <sup>9</sup> and assuming 18·10 <sup>6</sup> cells per ml sample culture and an average osmotic cell volume of 29.5 fL, i.e. 1/18/29.5·10 <sup>8</sup> . |
| $Gly_{ex}$     | $\frac{[Gly_{in}]_0}{1000}$                                         | Extracellular glycerol, assumed to be 1000 times lower than $Gly_{in}$ . As a consequence, the external                                                                                                                                                |

|                                |                                                                                                                                                                                                                                                                |                                                                                                                                              |
|--------------------------------|----------------------------------------------------------------------------------------------------------------------------------------------------------------------------------------------------------------------------------------------------------------|----------------------------------------------------------------------------------------------------------------------------------------------|
|                                |                                                                                                                                                                                                                                                                | glycerol acts basically as a sink for the internal glycerol.                                                                                 |
| $\dagger$<br><b>Sensitizer</b> | 3.42838                                                                                                                                                                                                                                                        | A hypothetical entity which modulates <i>Slt2Signal</i> degradation rate. The initial concentration of sensitizer is estimated by the model. |
| <b>HogSignal</b>               | $\frac{k_0 - V_{os_0} \cdot k_2 - k_1 \cdot k_{m2}}{2 \cdot k_1} + \frac{\sqrt{(k_0 - V_{os_0} \cdot k_2 - k_1 \cdot k_{m2})^2 + 4 \cdot k_0 \cdot k_1 \cdot k_{m2}}}{2 \cdot k_1}$                                                                            | A hypothetical entity which triggers <i>Hog1</i> activation.                                                                                 |
| $\dagger$ <b>Slt2Signal</b>    | $\frac{k_9 \cdot V_{os_0} - k_{11} \cdot [Sensitizer]_0 - k_{10} \cdot k_{m11}}{2 \cdot k_1} + \frac{\sqrt{(k_{11} \cdot [Sensitizer]_0 - k_{10} \cdot k_{m11} - k_9 \cdot V_{os_0})^2 + 4 \cdot k_{10} \cdot V_{os_0} \cdot k_9 \cdot k_{m11}}}{2 \cdot k_1}$ | A hypothetical entity which triggers <i>Slt2</i> activation.                                                                                 |
| <b>Slt2Signal</b>              | $\frac{k_9 \cdot V_{os_0} - k_{11} - k_{10} \cdot k_{m11}}{2 \cdot k_1} + \frac{\sqrt{(k_{11} - k_{10} \cdot k_{m11} - k_9 \cdot V_{os_0})^2 + 4 \cdot k_{10} \cdot V_{os_0} \cdot k_9 \cdot k_{m11}}}{2 \cdot k_1}$                                           | A hypothetical entity which triggers <i>Slt2</i> activation.                                                                                 |

1

2

1 **Table S7: Auxiliary variables, physical quantities and their Definition/value.**

2 Concentrations are denoted by  $[\ ]$  and  $[\ ]_0$  denotes the initial concentration. Volumes  
 3 are in femtolitre (fL), concentrations are in ( $\mu\text{mol}/\text{fL}$ ).

4

| Variable/Parameter        | Definition/Value                                                                                                                                                                                  | Remark                                                                             |
|---------------------------|---------------------------------------------------------------------------------------------------------------------------------------------------------------------------------------------------|------------------------------------------------------------------------------------|
| $V_b$                     | $V_0 \cdot f_{min}$                                                                                                                                                                               | Solid or minimal volume of the cell.                                               |
| $V$                       | $V_{os} + V_b$                                                                                                                                                                                    | Total cell volume.                                                                 |
| $V_{os0}$                 | $V_0(1 - f_{min})$                                                                                                                                                                                | Initial osmotically active volume.                                                 |
| $V_{P=0}$                 | $V_0 e^{\frac{P_0}{\varepsilon}}$                                                                                                                                                                 | Non-turgid volume.                                                                 |
| $A$                       | $(36\pi)^{1/3} V^{2/3}$                                                                                                                                                                           | Total cell surface area.                                                           |
| $f_{N2\mu M}$             | $10^{21} \text{mol}^{-1} V_{os0}^{-1}$                                                                                                                                                            | Factor converting number of molecules in $\mu\text{M}$ concentrations per cell.    |
| $c_0^i$                   | $c_0^e + \frac{P_0}{f_{c2p} RT}$                                                                                                                                                                  | Initial total cellular osmolyte concentration.                                     |
| $c_0^{in}$                | $c_0^i - [Gly_{in}]$                                                                                                                                                                              | Initial non-permeable cellular osmolyte concentration.                             |
| $c_n^e$                   | $\begin{cases} 0 & t < t_{off} \\ s1 \cdot \left(1 - e^{-\frac{t_{off}-t}{t_m}}\right) & t_{off} < t < t_{off} + t_s \\ (s1 - s2) \cdot e^{-\frac{t_{off}+t_s-t}{t_m}} & \text{else} \end{cases}$ | Osmotic sorbitol shock. Starts at time $t_s$ and has a certain mixing time $t_m$ . |
| $c_0^e$ [ $\mu\text{M}$ ] | 260000                                                                                                                                                                                            | Initial osmolarity of the medium <sup>7</sup> .                                    |
| $t_{off}$ [s]             | 120                                                                                                                                                                                               | Time [s] before first osmotic stress.                                              |
| $t_s$ [s]                 | 840                                                                                                                                                                                               | Time [s] between two consecutive osmotic stresses.                                 |
| $t_m$ [s]                 | 10                                                                                                                                                                                                | Mixing time [s] of sorbitol in the medium.                                         |
| $S1$ [ $\mu\text{M}$ ]    | 800000                                                                                                                                                                                            | Sorbitol concentration, in cell culture medium,                                    |

|                                                |                                                                                                                          |                                                                                                                        |
|------------------------------------------------|--------------------------------------------------------------------------------------------------------------------------|------------------------------------------------------------------------------------------------------------------------|
|                                                |                                                                                                                          | for first osmotic stress.                                                                                              |
| $S_2[\mu\text{M}]$                             | 270000                                                                                                                   | Sorbitol concentration, in cell culture medium, for second osmotic stress.                                             |
| $Osm_{in}$                                     | $[Gly_{in}] + \frac{c_0^{in} V_{os0}}{V_{os}}$                                                                           | Intracellular osmotically active concentration.                                                                        |
| $Osm_{ex}$                                     | $c_0^e + c_n^e + [Gly_{ex}] - [Gly_{ex}]_0$                                                                              | Extracellular osmotically active concentration.                                                                        |
| $Turgor$                                       | $\begin{cases} \varepsilon \cdot \ln\left(\frac{V}{V_P}\right) & \text{for } V > V_{P=0} \\ 0 & \text{else} \end{cases}$ | Turgor pressure [MPa].                                                                                                 |
| $R$ [J/mol/K]                                  | 8.314                                                                                                                    | Gas constant.                                                                                                          |
| $T$ [K]                                        | 303.15                                                                                                                   | Temperature in kelvin corresponds to 30°C.                                                                             |
| $Mol$                                          | $6.022 \cdot 10^{23}$                                                                                                    | Mole number.                                                                                                           |
| $f_{c2p}$                                      | $10^{-9}$                                                                                                                | Factor converting concentrations in M to pressures in MPa.                                                             |
| $L_p$<br>[ $\mu\text{m}/\text{Mpa}/\text{s}$ ] | 0.013                                                                                                                    | Hydraulic conductivity (estimate from data from <sup>10</sup> ).                                                       |
| $P_0$ [MPa]                                    | 0.61                                                                                                                     | Initial turgor pressure <sup>7</sup> .                                                                                 |
| $\varepsilon$                                  | 14.3                                                                                                                     | Membrane rigidity <sup>7</sup> .                                                                                       |
| $f_{min}$                                      | 0.41                                                                                                                     | Minimal cell volume (as fraction of total) <sup>7</sup> .                                                              |
| $f_n$                                          | 0.8                                                                                                                      | Fraction of activated Hog1 molecule in the nucleus upon maximal activation.                                            |
| $V_0$ [fL]                                     | 50                                                                                                                       | Initial total cell volume.                                                                                             |
| $V_{medium}$ [fL]                              | $1000 \cdot V_0$                                                                                                         | External volume.                                                                                                       |
| $Hog1_t$ [ $\mu\text{M}$ ]                     | 0.3821                                                                                                                   | $6788 \cdot f_{n2\mu\text{M}}$ : molecule numbers from <a href="http://yeastgfp.yeastgen">http://yeastgfp.yeastgen</a> |

|                                                  |       | ome.org/                                                                                                                        |
|--------------------------------------------------|-------|---------------------------------------------------------------------------------------------------------------------------------|
| <b><i>Fps1<sub>t</sub></i></b> [ $\mu\text{M}$ ] | 0.051 | 907 $f_{n2\mu\text{M}}$ : molecule numbers from <a href="http://yeastgfp.yeastgenome.org/">http://yeastgfp.yeastgenome.org/</a> |

1

1 **Table S8: Reaction rate constants and model parameters.**

2  $[ ]_0$  indicates initial concentration ( $\mu\text{mol/L}$ ). The volume is in femtolitre (fL), and the  
 3 concentration is  $\mu\text{mol/L}$ , mass is in grams and time in seconds. Variables with dagger  
 4 sign ( $\dagger$ ) are only present in the models with sensitized negative feedback.

5

| Parameter  | Value                                                                                                 | Description                                                                              | Method     |
|------------|-------------------------------------------------------------------------------------------------------|------------------------------------------------------------------------------------------|------------|
| $k_0$      | 59.901                                                                                                | <i>Hog1Signal</i> production rate constant.                                              | Estimated  |
| $k_1$      | 25.4711                                                                                               | <i>Hog1Signal</i> degradation rate constant.                                             | Estimated  |
| $V_{max2}$ | 2.15338                                                                                               | Volume mediated <i>Hog1Signal</i> degradation $v_{max}$ .                                | Estimated  |
| $k_{m2}$   | 0.000939165                                                                                           | Volume mediated <i>Hog1Signal</i> degradation Michaelis constant.                        | Estimated  |
| $k_3$      | 0.231769                                                                                              | <i>Hog1</i> phosphorylation rate constant.                                               | Estimated  |
| $k_4$      | $\frac{k_3 \cdot [Hog1Signal]_0 \cdot [Hog1]_0}{[Hog1PP]_0 \cdot [1 + K_{i3} \cdot [Slt2PP]_0^{n3}]}$ | <i>Hog1PP</i> dephosphorylation rate constant, calculated using steady state assumption. | Calculated |
| $k_5$      | 0.12348                                                                                               | <i>Hog1PP</i> mediated <i>Fps1</i> closure rate constant.                                | Estimated  |
| $k_6$      | 1.1077e-06                                                                                            | <i>Slt2PP</i> mediated <i>Fps1</i> dephosphorylation (opening).                          | Calculated |
| $k_{6b}$   | $\frac{k_5 \cdot [Hog1PP]_0 \cdot [Fps1]_0 - k_6 \cdot [Slt2PP]_0 \cdot [Fps1P]_0}{[Fps1P]_0}$        | <i>Slt2PP</i> independent (Basal) <i>Fps1</i> dephosphorylation.                         | Estimated  |
| $V_{max7}$ | 849.986                                                                                               | <i>Hog1PP</i> mediated glycerol production $v_{max}$ .                                   | Estimated  |

|                  |                                                                                                                                      |                                                                                                          |            |
|------------------|--------------------------------------------------------------------------------------------------------------------------------------|----------------------------------------------------------------------------------------------------------|------------|
| $k_{m7}$         | $\frac{v_{max7} \cdot [Hog1PP]_0 \cdot V_{os0}}{[Fps1_{open}]_0 \cdot k_8 \cdot A \cdot ([Gly_{in}]_0 - [Gly_{ex}]_0) - [Hog1PP]_0}$ | <i>Hog1PP</i> mediated glycerol production Michaelis constant, calculated using steady state assumption. | Calculated |
| $k_8$            | 0.000776772                                                                                                                          | <i>Fps1</i> facilitated glycerol diffusion constant.                                                     | Estimated  |
| $k_9$            | 0.0772144                                                                                                                            | Volume mediated <i>Slt2Signal</i> production rate constant.                                              | Estimated  |
| $k_{10}$         | 0.000131323                                                                                                                          | <i>Slt2Signal</i> degradation rate constant.                                                             | Estimated  |
| $V_{max11}$      | 0.713377                                                                                                                             | <i>Sensitizer/Slt2PP</i> mediated <i>Slt2Signal</i> degradation $v_{max}$ .                              | Estimated  |
| $k_{m11}$        | 0.0180575                                                                                                                            | <i>Sensitizer/Slt2PP</i> mediated <i>Slt2Signal</i> degradation $k_m$ .                                  | Estimated  |
| $k_{12}$         | 0.00929813                                                                                                                           | <i>Slt2Signal</i> mediated <i>Slt2</i> phosphorylation rate constant.                                    | Estimated  |
| $k_{13}$         | $\frac{v_{max12} \cdot [Slt2Signal]_0 \cdot [Slt2]_0}{[Slt2PP]_0 \cdot (1 + K_{i12} \cdot [Hog1PP]_0^{n12})}$                        | <i>Slt2PP</i> dephosphorylation rate constant, calculated using steady state assumption.                 | Calculated |
| $\dagger k_{14}$ | 0.113591                                                                                                                             | <i>Slt2PP</i> mediated <i>sensitizer</i> production rate constant.                                       | Estimated  |
| $\dagger k_{15}$ | $\frac{k_{14} \cdot [Slt2PP]_0 + \frac{v_{max16}}{1 + \left(\frac{[Sensitizer]_0}{K_{i16}}\right)^{n16}}}{[Sensitizer]_0}$           | <i>Sensitizer</i> degradation rate constant, calculated using steady state assumption.                   | Calculated |

|                     |         |                                                       |           |
|---------------------|---------|-------------------------------------------------------|-----------|
| $\dagger V_{max16}$ | 1       | Sensitizer Auto<br>inhibitory feedback<br>$V_{max}$ . | set       |
| $\dagger K_{i16}$   | 3.08897 | Sensitizer Auto<br>inhibitory feedback<br>constant.   | Estimated |
| $\dagger n_{16}$    | 999.898 | Sensitizer Auto<br>inhibitory feedback<br>power.      | Estimated |

1

2



**1 Supplementary References:**

- 2 1 Hoops, S. *et al.* COPASI--a COmplex Pathway SIMulator. *Bioinformatics* **22**, 3067-  
3 3074, doi:10.1093/bioinformatics/btl485 (2006).
- 4 2 Schaber, J. *et al.* Automated ensemble modeling with modelMaGe: analyzing feedback  
5 mechanisms in the Sho1 branch of the HOG pathway. *PLoS One* **6**, e14791,  
6 doi:10.1371/journal.pone.0014791 (2011).
- 7 3 Burnham, K. P. & Anderson, D. R. *Model Selection and Multi-Model Inference: A*  
8 *Practical Information-Theoretic Approach*. (Springer, 2010).
- 9 4 Raue, A. *et al.* Structural and practical identifiability analysis of partially observed  
10 dynamical models by exploiting the profile likelihood. *Bioinformatics* **25**, 1923-1929,  
11 doi:10.1093/bioinformatics/btp358 (2009).
- 12 5 Schaber, J. Easy parameter identifiability analysis with COPASI. *Biosystems*,  
13 doi:10.1016/j.biosystems.2012.09.003 (2012).
- 14 6 Garcia-Rodriguez, L. J., Valle, R., Duran, A. & Roncero, C. Cell integrity signaling  
15 activation in response to hyperosmotic shock in yeast. *FEBS Lett* **579**, 6186-6190,  
16 doi:10.1016/j.febslet.2005.10.001 (2005).
- 17 7 Schaber, J. *et al.* Biophysical properties of *Saccharomyces cerevisiae* and their  
18 relationship with HOG pathway activation. *Eur Biophys J* **39**, 1547-1556,  
19 doi:10.1007/s00249-010-0612-0 (2010).
- 20 8 Lee, J. *et al.* MAPK Hog1 closes the *S. cerevisiae* glycerol channel Fps1 by  
21 phosphorylating and displacing its positive regulators. *Genes Dev* **27**, 2590-2601,  
22 doi:10.1101/gad.229310.113 (2013).
- 23 9 Klipp, E., Nordlander, B., Kruger, R., Gennemark, P. & Hohmann, S. Integrative model  
24 of the response of yeast to osmotic shock. *Nat Biotechnol* **23**, 975-982,  
25 doi:10.1038/nbt1114 (2005).
- 26 10 Eriksson, E. *et al.* A microfluidic device for reversible environmental changes around  
27 single cells using optical tweezers for cell selection and positioning. *Lab Chip* **10**, 617-  
28 625, doi:10.1039/b913587a (2010).

29

30

31
